# Supplementary material for: Blood-based biomarkers for Alzheimer’s disease: influence of kidney function
Source: Research Square preprint supplement (doi:10.21203/rs.3.rs-8007954/v1), 2025-11-23

**Supplementary Table 1.** Plasma biomarkers concentrations in the different diagnostic groups.

| **Diagnoses of patients with other neurological diseases (OND)** | **N** |
| --- | --- |
| Mild cognitive impairment not due to Alzheimer’s disease | 21 |
| Late onset epilepsy | 8 |
| Psychiatric diseases | 3 |
| Subjective cognitive decline not due to Alzheimer’s disease | 3 |
| Vascular encephalopathy | 2 |
| Normal pressure hydrocephalus | 1 |
| Polyneuropathy | 1 |

**Supplementary Table 2.** Plasma biomarkers concentrations in the different diagnostic groups.

|  |  | **AD** | **FTD** | **PSP** | **CBS** | **MND** | **PD** | **HD** | **OND** |  |
| --- | --- | --- | --- | --- | --- | --- | --- | --- | --- | --- |
| **N** |  | **52** | **5** | **6** | **2** | **1** | **6** | **1** | **39** | **p-value*** |
| **Aβ42 (pg/mL)** | *mean ± SD* | 30.92 ± 6.34 | 30.45 ± 3.12 | 32.88 ± 4.63 | 29.43 ± 8.49 | 27.96 ± NA | 30.17 ± 4.07 | 35.89 ± NA | 35.65 ± 8.99 | ns |
|  | *median [IQR]* | 29.70 [7.12] | 29.75 [4.57] | 31.22 [4.78] | 29.43 [6.01] | 27.96 [0.00] | 30.30 [2.96] | 35.89 [0.00] | 34.86 [10.80] |  |
| **Aβ40 (pg/mL)** | *mean ± SD* | 381.61 ± 75.23 | 343.09 ± 29.16 | 374.01 ± 64.96 | 274.12 ± 44.71 | 409.34 ± NA | 328.44 ± 42.87 | 299.25 ± NA | 397.53 ± 111.09 | ns |
|  | *median [IQR]* | 367.80 [77.97] | 335.40 [4.97] | 363.73 [73.29] | 274.12 [31.62] | 409.34 [0.00] | 320.01 [33.36] | 299.25 [0.00] | 371.41 [104.99] |  |
| **Aβ42/40** | *mean ± SD* | 0.08 ± 0.01 | 0.09 ± 0.01 | 0.09 ± 0.01 | 0.11 ± 0.01 | 0.07 ± NA | 0.09 ± 0.00 | 0.12 ± NA | 0.09 ± 0.01 | AD – OND p= 0.007 |
|  | *median [IQR]* | 0.08 [0.01] | 0.08 [0.02] | 0.09 [0.02] | 0.11 [0.01] | 0.07 [0.00] | 0.09 [0.01] | 0.12 [0.00] | 0.09 [0.02] |
| **p-tau217 (pg/mL)** | *mean ± SD* | 0.82 ± 0.49 | 0.17 ± 0.03 | 0.12 ± 0.05 | 0.19 ± 0.06 | 0.19 ± NA | 0.15 ± 0.10 | 0.10 ± NA | 0.21 ± 0.18 | AD – OND; AD – PSP; AD - PD p < 0.001 |
|  | *median [IQR]* | 0.78 [0.66] | 0.19 [0.02] | 0.12 [0.06] | 0.19 [0.05] | 0.19 [0.00] | 0.12 [0.03] | 0.10 [0.00] | 0.16 [0.13] | |
| **p-tau181 (pg/mL)** | *mean ± SD* | 3.38 ± 1.25 | 2.03 ± 0.28 | 1.84 ± 0.51 | 1.47 ± 0.15 | 2.53 ± NA | 1.77 ± 0.26 | 1.53 ± NA | 2.41 ± 1.50 | AD – OND p < 0.001; AD – PD p= 0.007; AD - PSP p = 0.01 |
|  | *median [IQR]* | 3.17 [1.73] | 1.97 [0.24] | 1.77 [0.39] | 1.47 [0.10] | 2.53 [0.00] | 1.79 [0.19] | 1.53 [0.00] | 2.04 [1.29] |
| **NfL (pg/mL)** | *mean ± SD* | 39.48 ± 23.79 | 29.46 ± 7.08 | 24.49 ± 2.15 | 49.83 ± 5.52 | 76.19 ± NA | 23.79 ± 12.48 | 9.29 ± NA | 68.87 ± 94.06 | ns |
|  | *median [IQR]* | 31.83 [20.83] | 29.55 [11.59] | 24.66 [3.54] | 49.83 [3.91] | 76.19 [0.00] | 23.34 [5.59] | 9.29 [0.00] | 32.67 [26.16] |  |

**Abbreviations:** AD, Alzheimer’s disease; CBS, Corticobasal syndrome; FTD, Frontotemporal dementia; HD, Huntington’s disease; IQR, interquartile range; MND, motor neuron disease; N, number of individuals per group; NfL, neurofilament light chain; OND, other neurological diseases; PD, Parkinson’s disease; PSP, progressive supranuclear palsy; SD, standard deviation; Aβ40, beta-amyloid 40 (pg/mL); Aβ42, beta-amyloid 42 (pg/mL); Aβ42/40, beta-amyloid 42/40 ratio; p-tau181, tau phosphorylated at threonine 181 (pg/mL); p-tau217, tau phosphorylated at threonine 217 (pg/mL); pg/mL, picograms per milliliter.

**Legend:** * Group comparisons were performed using the Kruskal–Wallis test followed, when significant, by Dunn’s post-hoc test with Benjamini–Hochberg correction for multiple comparisons.

**Supplementary Table 3.** P-values of covariates tested in the linear regression between plasma and CSF NfL (all variables have been log10-transformed)

| **Covariates (log10-transformed)** | **p-values** |
| --- | --- |
| Plasma Aβ40 | 0.0049 |
| Serum creatinine | 3.4*10-4 |
| eGFR | 6.2*10-7 |
| Age | 0.066 |

**Abbreviations.** Aβ40: amyloid-β peptide 40 aminoacids. eGFR: estimated glomerular filtration rate. NfL: Neurofilament light chain.

**Supplementary Table 4.** P-values of covariates tested in the linear regression between plasma + eGFR (Model 1) and CSF NfL (all variables have been log10-transformed)

| **Covariates (log10-transformed)** | **p-values** |
| --- | --- |
| Plasma Aβ40 | 0.48 |
| Serum creatinine | 0.16 |
| Age | 0.01 |

**Abbreviations.** Aβ40: amyloid-β peptide 40 aminoacids. eGFR: estimated glomerular filtration rate. NfL: Neurofilament light chain.

**Supplementary Table 5.** Coefficients and standard error of the variables used in Model 2 (linear regression of CSF NfL and plasma NfL + eGFR + age

| **Variable** | **Coefficient** | **Standard error** |
| --- | --- | --- |
| Intercept | -2 | 1.08 |
| Log10 eGFR | 0.94 | 0.17 |
| Log10 Age | 0.63 | 0.24 |

**Abbreviations.** eGFR: estimated glomerular filtration rate. NfL: Neurofilament light chain.

**Supplementary Figure 1.** Best accuracy at threshold for plasma pTau217-corr. (A), pTau181-corr (B), and Aβ42/Aβ40 (C), in predicting a CSF A+T+ status (A and B) and a CSF A+ status (C).


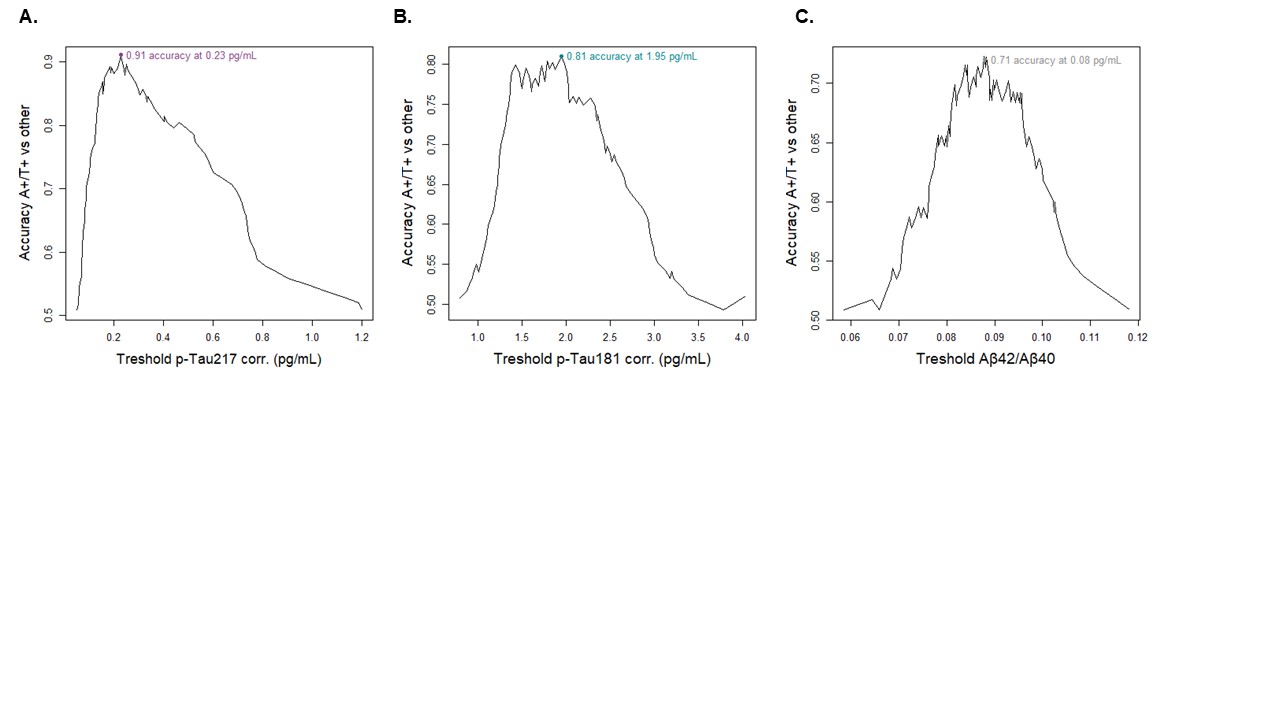

Supplement: Supplementary file 1 [file 5cb3e6acd9e31d41f554b93f.docx]
